# Supplementary material for: Effect of Recycled Rubber on the Properties of Road Bitumen
Source: Hindawi journal article supplement (doi:10.1155/2018/8759549), 2018-10-21
Supplement: f1 [file 8759549.f1.pdf]

## Supplementary Data

Research data connected to Table 3

| Property                                     | Sample No.             |                        |                         |                         |
|----------------------------------------------|------------------------|------------------------|-------------------------|-------------------------|
|                                              | 1                      | 2                      | 3                       | 4                       |
| penetration at 25°C [0.1 mm]                 | 71,72,70               | 69,69,70               | 66,67,66                | 69,68,69                |
| softening point (R&B) [°C]                   | 52.0, 52.1,<br>52.0    | 56.4, 56.4,<br>56.4    | 57, 57.1,<br>56.9       | 55.6, 55.6,<br>55.7     |
| penetration index                            | 0.20, 0.33,<br>0.18    | 1.10, 1.12,<br>1.09    | 1.10, 1.10,<br>1.10     | 0.90, 0.91,<br>0.90     |
| Fraass breaking point [°C]                   | -20                    | -22                    | -22                     | -23                     |
| elastic recovery at 25°C [%]                 | 69, 68, 69             | 74,75, 74              | 75, 75, 76              | 72, 72, 73              |
| retained penetration at 25°C after RTFOT [%] | 60.2, 59.9,<br>60.3    | 61, 60.9, 61           | 60.4, 60.3,<br>60.4     | 61.4, 60.9,<br>61.6     |
| mass change after RTFOT [%]                  | -0.16, -0.20,<br>-0.13 | -0.16, -0.16,<br>-0.17 | -0.13, -<br>0.14, -0.12 | -0.12, -<br>0.12, -0.12 |

Research data connected to Table 4

| Property                                     | Sample No.                 |                            |                          |                        |                        |                        |                             |
|----------------------------------------------|----------------------------|----------------------------|--------------------------|------------------------|------------------------|------------------------|-----------------------------|
|                                              | 7                          | 8                          | 9                        | 10                     | 11                     | 12                     | 13                          |
| penetration at 25°C [0.1 mm]                 | 80, 79,<br>80              | 78, 78,<br>79              | 80, 80,<br>81            | 104, 100,<br>108       | 96, 96,<br>97          | 97, 97,<br>98          | 86, 87,<br>86               |
| Softening point (R&B) [°C]                   | 55.4,<br>56.0,<br>53.7     | 52.8, 53,<br>52.7          | 49.9,<br>50.0,<br>49.7   | 48.0,<br>47.8,<br>48.3 | 50.8,<br>50.9,<br>50.5 | 51.9,<br>52.0,<br>51.8 | 51.6,<br>51.8,<br>52.0      |
| penetration index                            | 1.3, 1.2,<br>1.3           | 0.60,<br>0.62,<br>0.60     | 0.00,<br>0.00,<br>0.00   | 0.60,<br>0.62,<br>0.60 | 0.80,<br>0.78,<br>0.83 | 0.33,<br>0.36,<br>0.32 | 0.60,<br>0.67,<br>0.57      |
| Fraass breaking point [°C]                   | -28                        | -27                        | -26                      | -26                    | -28                    | -26                    | -25                         |
| elastic recovery at 25°C [%]                 | 70, 70,<br>71              | 70, 70,<br>71              | 63, 64,<br>63            | 62, 60,<br>64          | 60, 61,<br>60          | 76, 75,<br>76          | 63, 64,<br>62               |
| retained penetration at 25°C after RTFOT [%] | 62.4,<br>63.0,<br>62.0     | 60.5,<br>60.7,<br>60.4     | 61.2,<br>61.0,<br>61.5   | 55.0,<br>55.1,<br>55.0 | 58.0,<br>59.0,<br>57.1 | 66.0,<br>66.8,<br>65.6 | 60.2,<br>60.0,<br>60.5      |
| mass change after RTFOT [%]                  | -0.68, -<br>0.70,-<br>0.67 | -0.70, -<br>0.69,-<br>0.72 | 0.73,-<br>0.75,-<br>0.72 | 0.84,<br>0.88,0.82     | 0.64,<br>0.65,0.<br>64 | 0.24,<br>0.30,<br>0.21 | -0.47, -<br>0.50, -<br>0.44 |
